# Supplementary material
Source: PubMed Central journal article supplement (PMC5538781)
Supplement: NIHMS882077-supplement-1.pdf [file NIHMS882077-supplement-1.pdf]

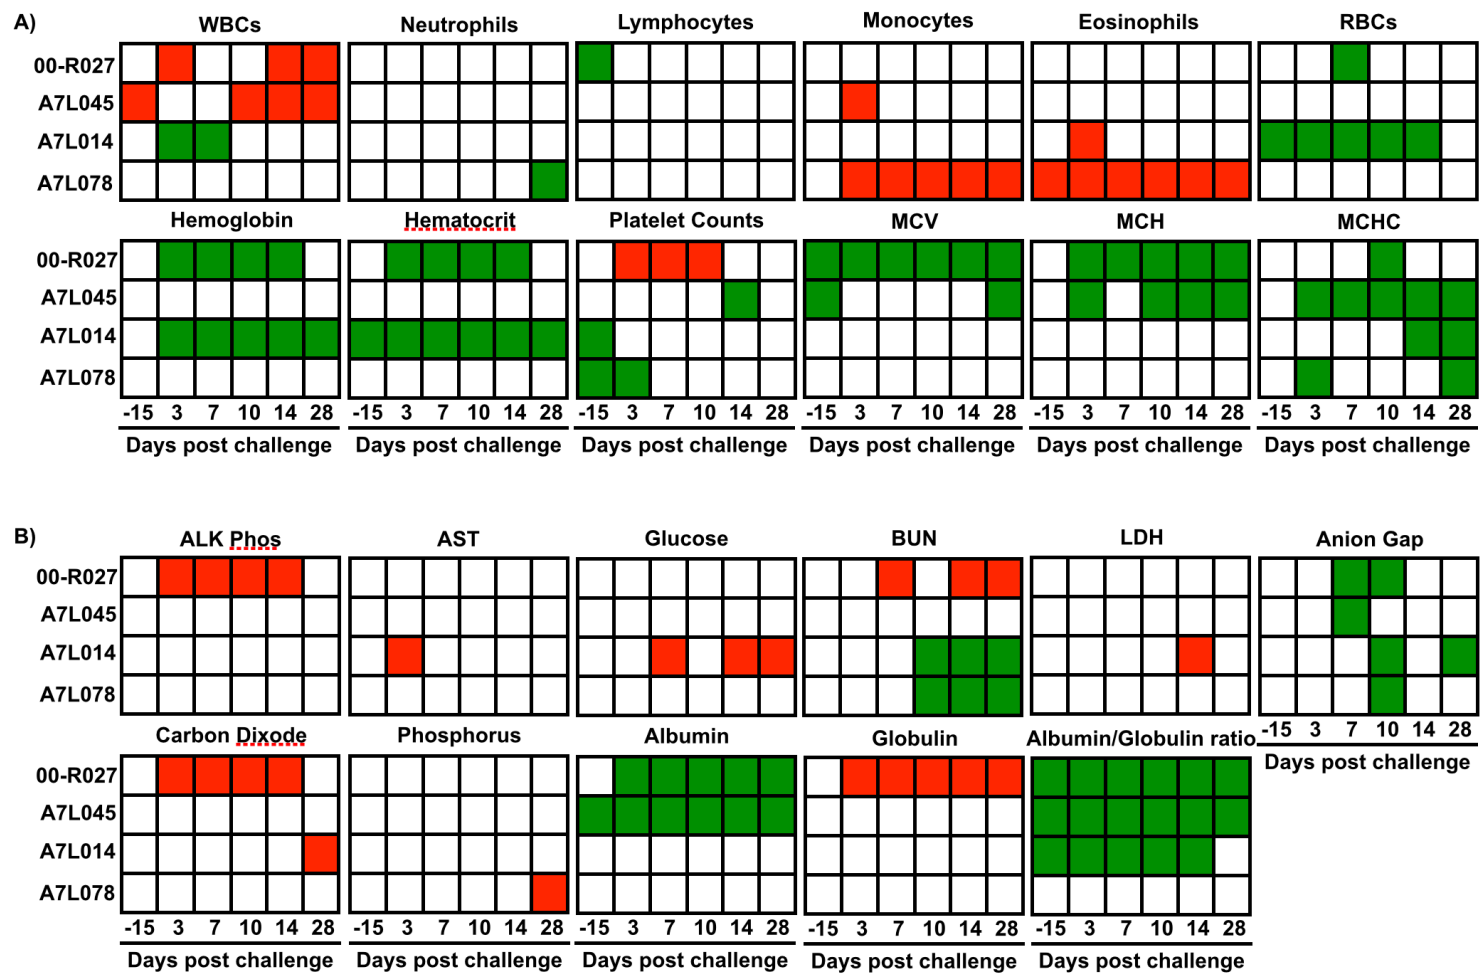

**Supplemental Figure 1 - ZIKV challenged macaques presented marginal hematology (A) and chemistry (B) alterations. Several parameters were checked and the ones that presented changes regarding the normal macaque range are listed. Abbreviations: white blood cells (WBCs), red blood cells (RBCs), mean cellular volume (MCV), mean corpuscular hemoglobin (MCH) and mean cellular hemoglobin counts (MCHC), alkaline phosphatase (ALK Phos), aspartate aminotransferase (AST), (BUN), lactate dehydrogenase (LDH). Normal range values: above (red) and below (green).**

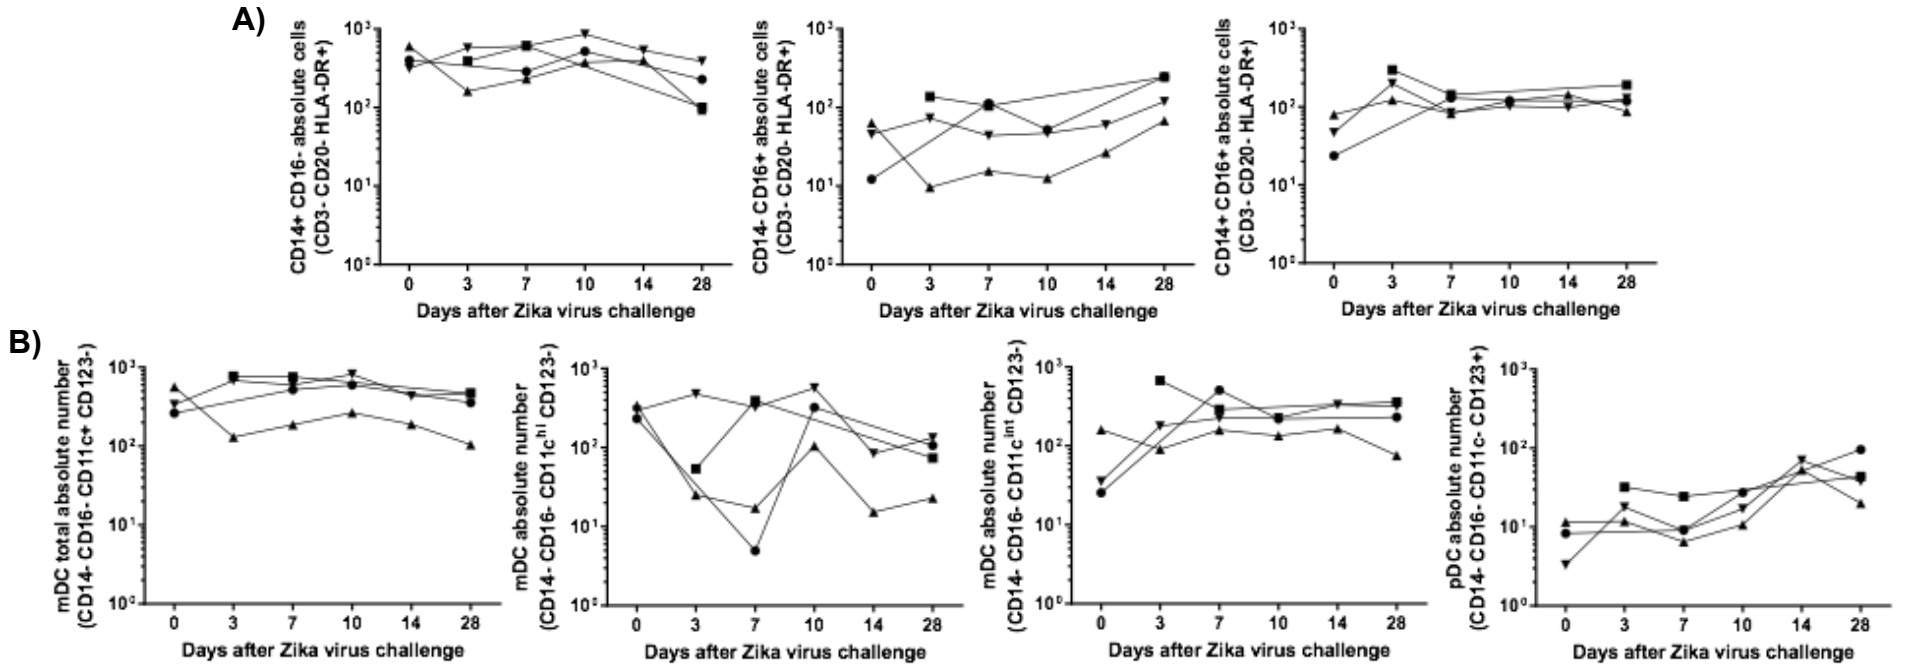

**Supplemental Figure 2** - ZIKV challenge had low effect on absolute number of distinct monocyte (A) and DC subsets (B) in PBMCs of rhesus macaques. In both cases, the counting of absolute number of cells has been generated through the combination of CBC (collected up to day 28) and flow cytometry.

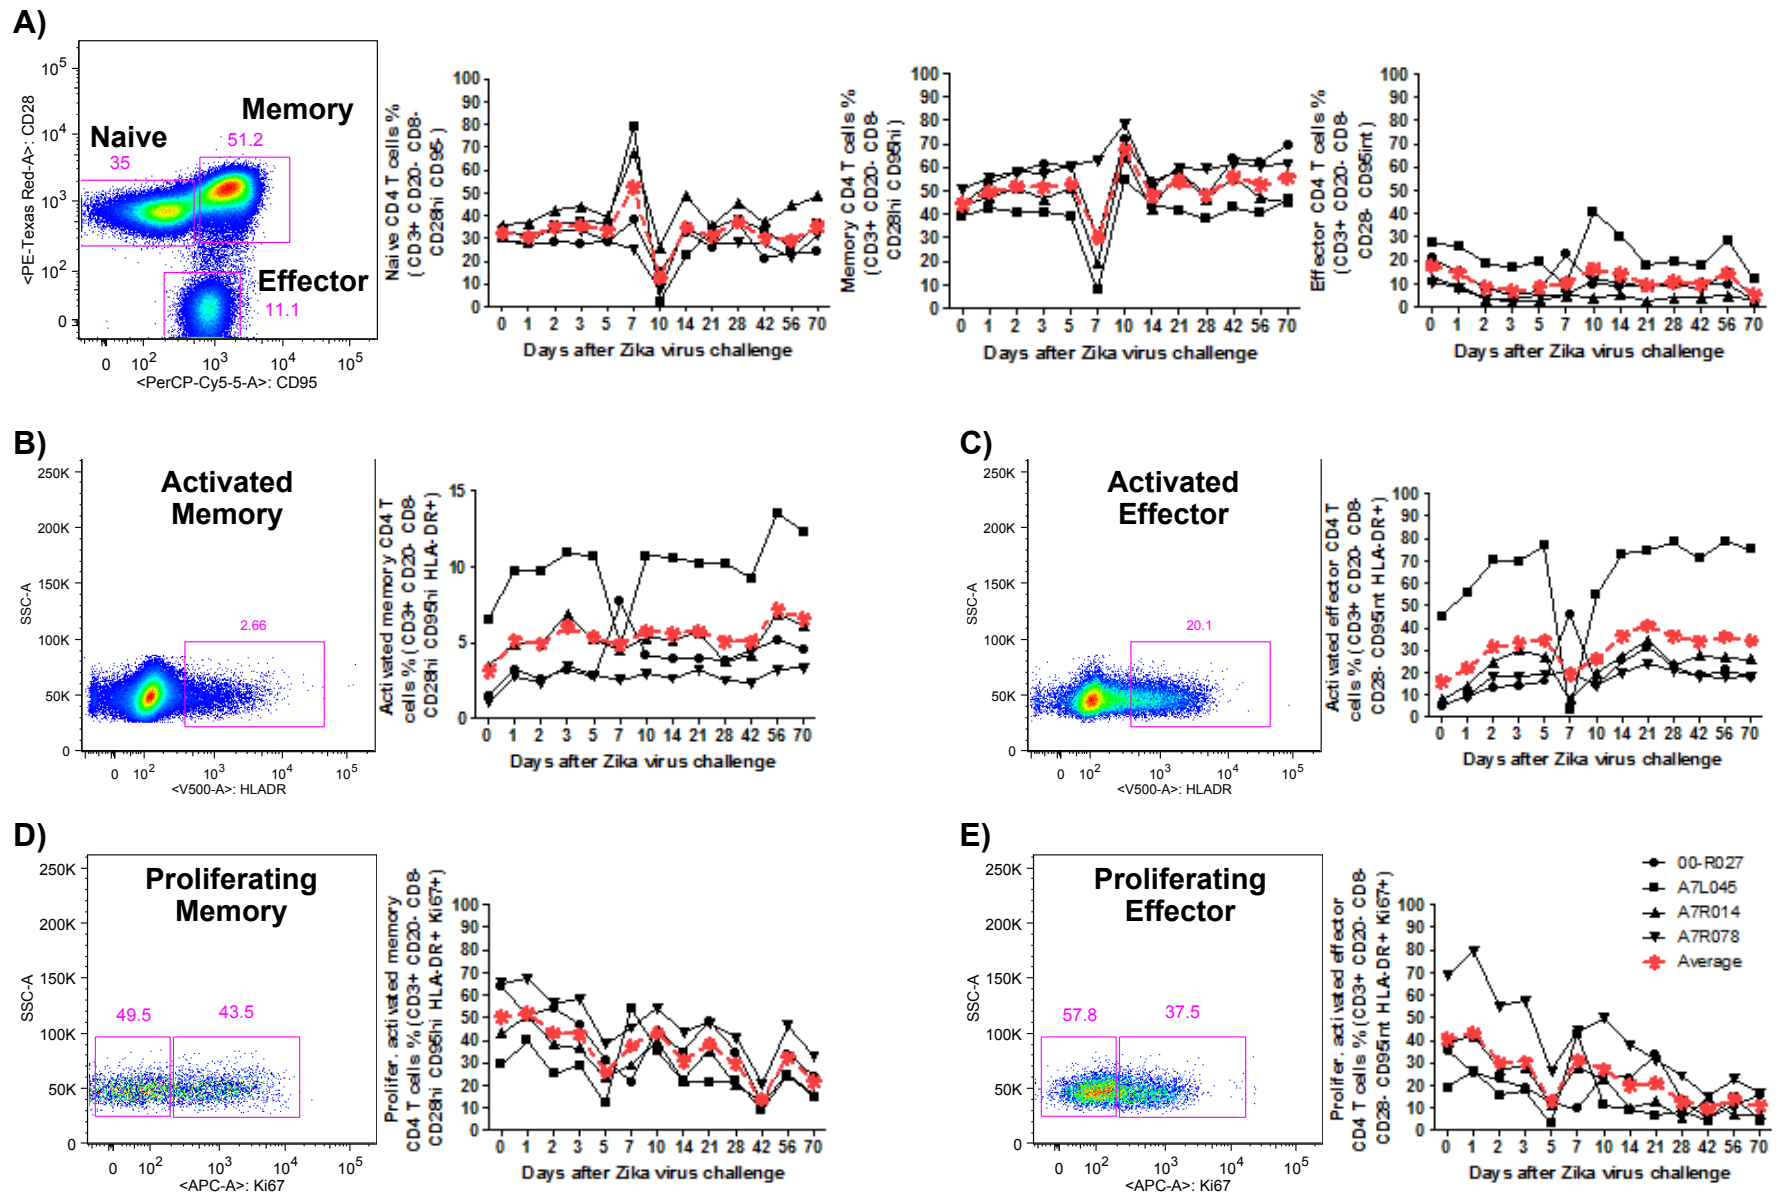

**Supplemental Figure 3** - ZIKV challenge had low effect on total CD4+ T cell frequencies in rhesus macaques. A) Representative flow cytometry data showing a CD4+ T cell gate with 3 distinct cell subsets (naive (CD3+ CD20- CD28hi CD95-), effector (CD3+ CD20- CD28hi CD95hi) and memory (CD3+ CD20- CD28- CD95int) and their respective kinetics. Frequency of activated (HLA-DR+) or proliferating (Ki67+) memory (B and D) or effector CD4+ T cells (C and E), followed by their respective kinetics.

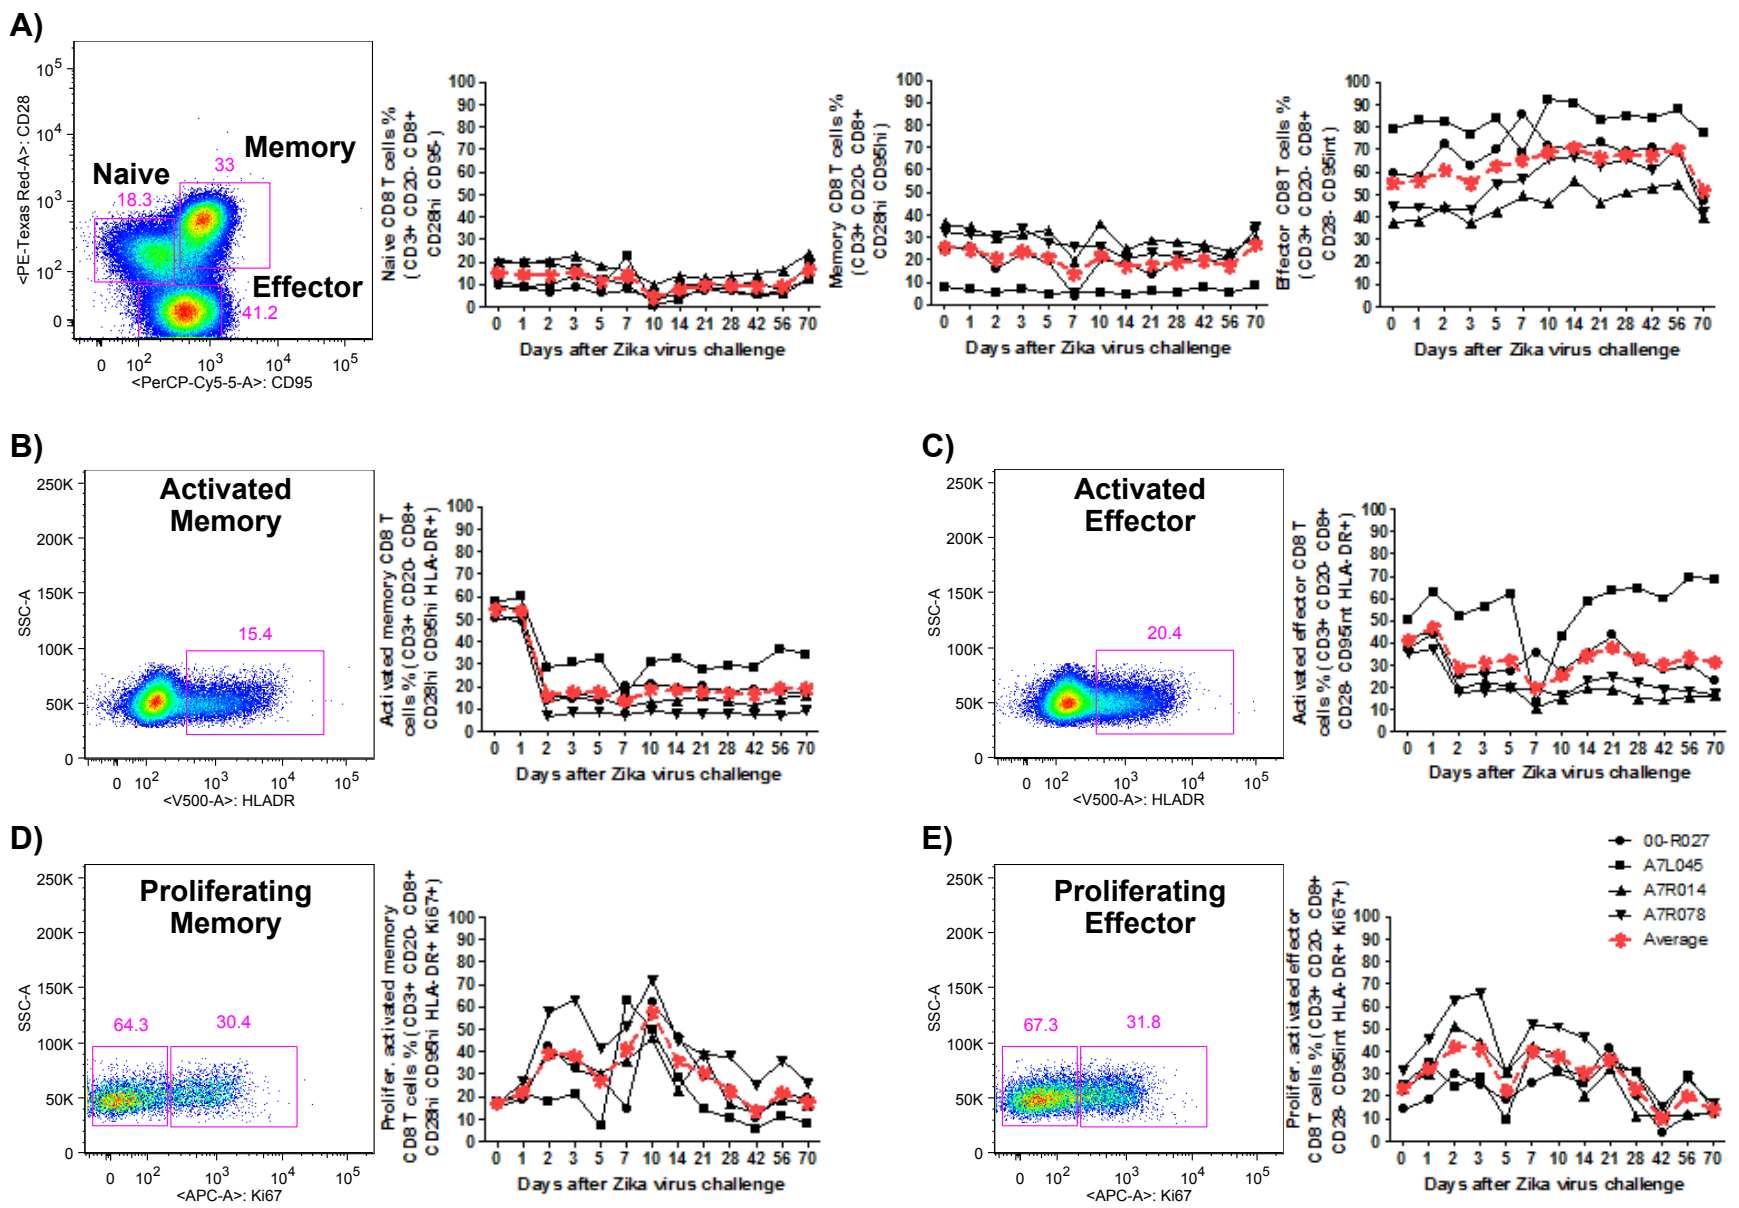

**Supplemental Figure 4** - ZIKV challenge had low effect on total CD8+ T cell responses derived from rhesus macaque PBMCs. A) Representative flow cytometry data showing a CD8+ T cell gate with 3 distinct cell subsets (naive (CD3+ CD20- CD28hi CD95-), effector (CD3+ CD20- CD28hi CD95hi) and memory (CD3+ CD20- CD28- CD95int) and their respective kinetics. Frequency of activated (HLA-DR+) or proliferating (Ki67+) memory (B and D) or effector CD8+ T cells (C and E), followed by their respective kinetics.
